# Supplementary material for: A new automatic approach for extracting glacier centerlines based on Euclidean allocation
Source: Copernicus journal article supplement (doi:10.5194/tc-15-1955-2021), 2021-04-21
Supplement: Supplementary file 1 [file tc-15-1955-2021-supplement.zip]

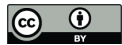

## *Supplement of*

# **A new automatic approach for extracting glacier centerlines based on Euclidean allocation**

**Dahong Zhang et al.**

*Correspondence to:* Xiaojun Yao (yaoxj\_nwnu@163.com) and Dahong Zhang (zhangdh\_yx@163.com)

- tc-15-1955-2021-supplement-title-page.pdf
- GlacierCenterlines\_Py27\_v5.2.0

– Data

- \* Glacier\_Samples.cpg
- \* Glacier\_Samples.dbf
- \* Glacier\_Samples.prj
- \* Glacier\_Samples.sbn
- \* Glacier\_Samples.sbx
- \* Glacier\_Samples.shp
- \* Glacier\_Samples.shp.xml
- \* Glacier\_Samples.shx
- \* Samples\_1.cpg
- \* Samples\_1.dbf
- \* Samples\_1.prj
- \* Samples\_1.sbn
- \* Samples\_1.sbx
- \* Samples\_1.shp
- \* Samples\_1.shp.xml
- \* Samples\_1.shx
- \* Samples\_2.cpg
- \* Samples\_2.dbf
- \* Samples\_2.prj
- \* Samples\_2.sbn
- \* Samples\_2.sbx
- \* Samples\_2.shp
- \* Samples\_2.shp.xml
- \* Samples\_2.shx
- \* srtm1wc1.tfw

- \* srtm1wc1.tif
    - \* srtm1wc1.tif.aux.xml
    - \* srtm1wc1.tif.ovr
    - \* srtm1wc1.tif.vat.cpg
    - \* srtm1wc1.tif.vat.dbf
  - GlacierCenterlines\_Py27.exe
  - Other\_parameters\_T1.txt
  - \_ctypes.pyd
  - \_hashlib.pyd
  - \_socket.pyd
  - \_ssl.pyd
  - \_tkinter.pyd
  - bz2.pyd
  - library.zip
  - python27.dll
  - res
  - select.pyd
  - site-packages
    - \* Desktop10.4\_32bit.pth
  - tcl
    - \* tcl8.5
    - \* tk8.5
  - tcl85.dll
  - tk85.dll
  - unicodedata.pyd
  - w9xppopen.exe
  - wx.\_controls\_.pyd
  - wx.\_core\_.pyd
  - wx.\_gdi\_.pyd
  - wx.\_misc\_.pyd
  - wx.\_windows\_.pyd
  - wxbase28uh\_net\_vc.dll
  - wxbase28uh\_vc.dll
  - wxmsw28uh\_adv\_vc.dll
  - wxmsw28uh\_core\_vc.dll
  - wxmsw28uh\_html\_vc.dll
- GlacierCenterlines\_Py27\_v5.2.0\_Help
    - A1\_GUI\_Splash screens.JPG
    - A2\_GUI\_Parameters.JPG
    - A3\_GUI\_Status.JPG
    - GlacierCenterlines\_Py27\_Help.txt

- test\_results
  - Ablationlines.cpg
  - Ablationlines.dbf
  - Ablationlines.prj
  - Ablationlines.sbn
  - Ablationlines.sbx
  - Ablationlines.shp
  - Ablationlines.shp.xml
  - Ablationlines.shx
  - Accumulationlines.cpg
  - Accumulationlines.dbf
  - Accumulationlines.prj
  - Accumulationlines.sbn
  - Accumulationlines.sbx
  - Accumulationlines.shp
  - Accumulationlines.shp.xml
  - Accumulationlines.shx
  - CGLength\_Logfile.txt
  - Dissolverlines.cpg
  - Dissolverlines.dbf
  - Dissolverlines.prj
  - Dissolverlines.sbn
  - Dissolverlines.sbx
  - Dissolverlines.shp
  - Dissolverlines.shp.xml
  - Dissolverlines.shx
  - final\_lines.cpg
  - final\_lines.dbf
  - final\_lines.prj
  - final\_lines.sbn
  - final\_lines.sbx
  - final\_lines.shp
  - final\_lines.shp.xml
  - final\_lines.shx
  - maxflines.cpg
  - maxflines.dbf
  - maxflines.prj
  - maxflines.sbn
  - maxflines.sbx
  - maxflines.shp
  - maxflines.shp.xml
  - maxflines.shx

- maximumpoints.cpg
- maximumpoints.dbf
- maximumpoints.prj
- maximumpoints.sbn
- maximumpoints.sbx
- maximumpoints.shp
- maximumpoints.shp.xml
- maximumpoints.shx
- minimumpoints.cpg
- minimumpoints.dbf
- minimumpoints.prj
- minimumpoints.sbn
- minimumpoints.sbx
- minimumpoints.shp
- minimumpoints.shp.xml
- minimumpoints.shx

The copyright of individual parts of the supplement might differ from the article licence.
